# Supplementary material
Source: PubMed Central journal article supplement (PMC8741752)
Supplement: NIHMS1764567-supplement-Supplement.pdf [file NIHMS1764567-supplement-Supplement.pdf]

*Supporting Information for:*

Does DIA data contain hidden gems? A case study related to Alzheimer's disease

Evan E. Hubbard,<sup>1</sup> Lilian R. Heil,<sup>2</sup> Gennifer E. Merrihew,<sup>2</sup> Jasmeer P. Chhatwal,<sup>3</sup> Martin R. Farlow,<sup>4</sup> Catriona A. McLean,<sup>5</sup> Bernardino Ghetti,<sup>6</sup> Kathy L. Newell,<sup>6</sup> Matthew P. Frosch,<sup>7</sup> Randall J. Bateman,<sup>8</sup> Eric B. Larson,<sup>9</sup> C. Dirk Keene,<sup>10</sup> Richard J. Perrin,<sup>11</sup> Thomas J. Montine,<sup>12</sup> Michael J. MacCoss,<sup>2</sup> Ryan R. Julian<sup>1\*</sup>

<sup>1</sup> Department of Chemistry, University of California, Riverside, California 92521, United States

<sup>2</sup> Department of Genome Sciences, University of Washington, Seattle, Washington, 98195, United States

<sup>3</sup> Harvard Medical School, Massachusetts General Hospital, Department of Neurology, 15 Parkman St, Suite 835, Boston MA 02114

<sup>4</sup> Department of Neurology, Indiana University School of Medicine, Indianapolis, Indiana, 46202

<sup>5</sup> Dept of Anatomical Pathology, Alfred Health, VIC, AUST

<sup>6</sup> Department of Pathology and Laboratory Medicine, Indiana University School of Medicine, Indianapolis, IN, 46202

<sup>7</sup> C.S. Kubik Laboratory for Neuropathology, and Massachusetts Alzheimer Disease Research Center, Massachusetts General Hospital, Boston, MA 02114

<sup>8</sup> Department of Neurology, Washington University School of Medicine, 660 South Euclid Avenue, Box 8111, St. Louis, 63110, Missouri, USA

<sup>9</sup> Kaiser Permanente Washington Health Research Institute and Department of Medicine, University of Washington, Seattle WA

<sup>10</sup> Department of Laboratory Medicine and Pathology, University of Washington, Seattle, Washington, 98195, United States

<sup>11</sup> Department of Pathology and Immunology, Department of Neurology, Washington University School of Medicine, Saint Louis, Missouri 63110, United States

<sup>12</sup> Department of Pathology, Stanford University, Stanford, CA, 94305, United States

\*corresponding author: ryan.julian@ucr.edu

Figure S1. Isomerization compared in hippocampus and SMTG of samples from the same brain.

Figure S2. Quantification of isomerization in peptide WDGQETTLVR from fatty acid binding protein, heart

Figure S3. Chromatograms of synthesized TDHGAEIVYK isomers compared to a Skyline chromatogram from SMTG containing all isomers

Figure S4. Quantification and chromatogram from isomerized amyloid beta peptide HDSGYEVHHQK

Table S1. List of proteins found to contain isomerization via automated search

Table S2. Brain Tissue Stratification Description for SMTG

Table S3. Brain Tissue Stratification Description for Hippocampus

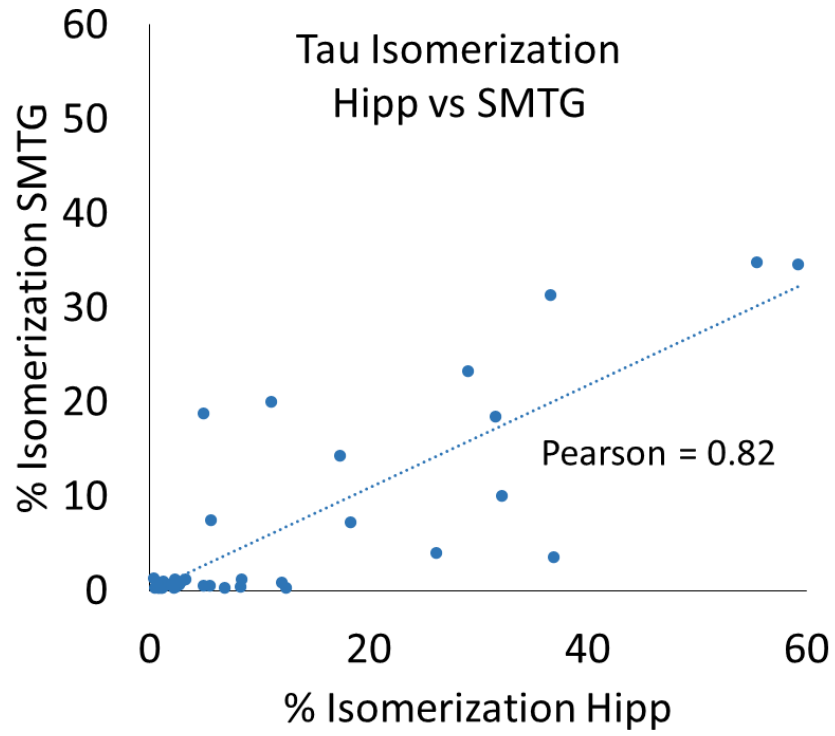

**Figure S1.** Comparison of Tau isomerization in the Hippocampus and SMTG regions in brains from which both regions were examined.

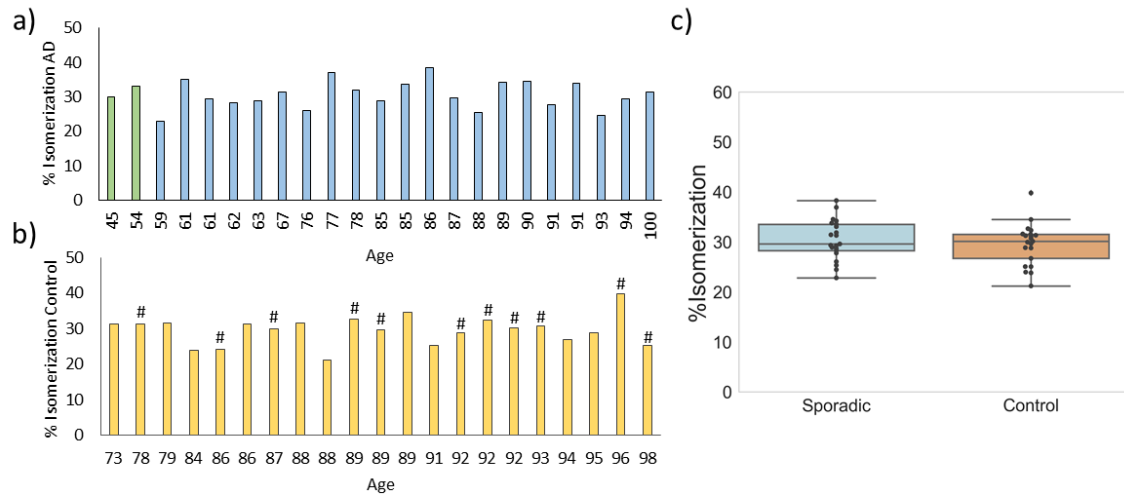

**Figure S2.** % Isomerization of the discovered isomerized peptide WDGQETTLVR [97, 106] of *fatty-acid binding protein, heart* in hippocampus. (a) % Isomerization of the AD group, samples organized by age. Blue is sporadic AD, green is ADAD. (b) % Isomerization of the control groups. # designates control-high. (c) Boxplot of % isomerization comparing sporadic AD and control groups.  $P=0.40$ . Extent of isomerization is consistent across AD and control populations.

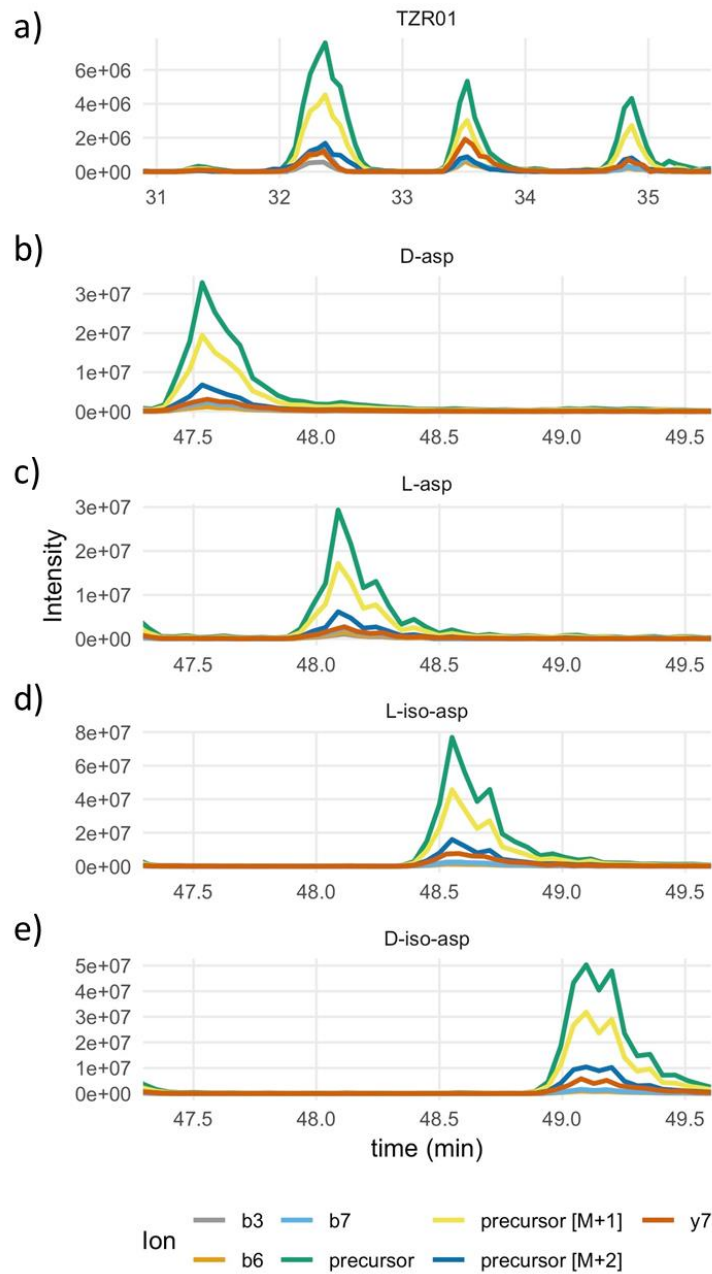

**Figure S3.** Comparison of DIA chromatogram of TDHGAEIVYK from the SMTG region a) to chromatograms of synthetic standards of TDHGAEIVYK isomers, b) D-Asp, c) L-Asp, d) L-isoAsp, e) D-isoAsp. Elution orders indicate that peaks observed in DIA data are, in order of retention time, D-asp, L-Asp, L-isoAsp, and D-isoAsp.

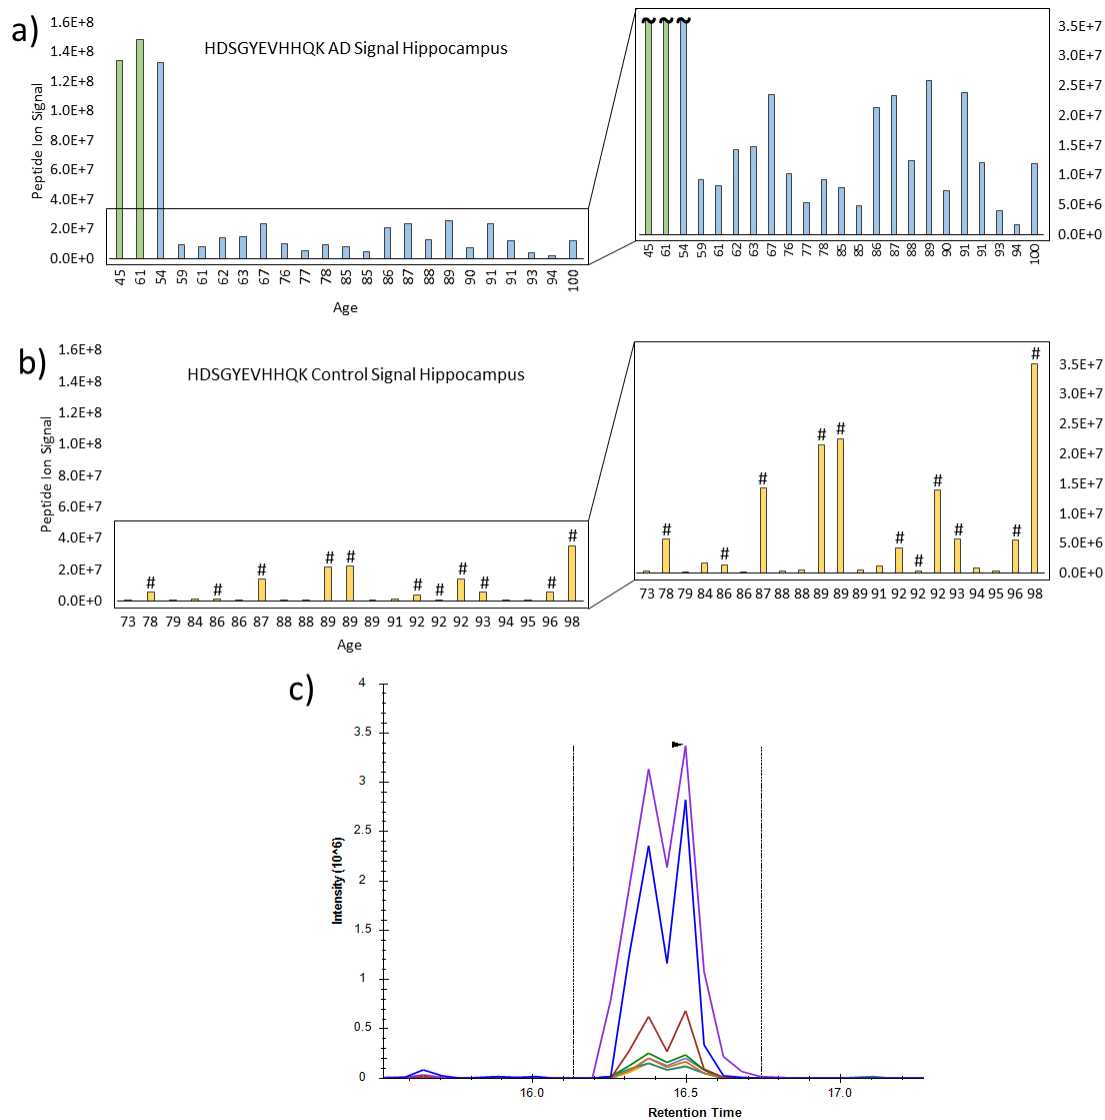

**Figure S4.** a) Degree of isomerization of HDSGYEVHHQK from A $\beta$  in sporadic AD (blue) and ADAD (green). Inset provides zoomed in view of the data. b) Same for controls. c) Example of the data illustrating incomplete separation of isomers. # designates control-high.

**Table S1. Discovered Isomerized Proteins in Hippocampus**

| Protein                                             | Peptide                      | AD Mean                                         | Control Mean | P-Value |
|-----------------------------------------------------|------------------------------|-------------------------------------------------|--------------|---------|
| Microtubule-associated protein tau                  | TDHGAEIVYK [702,711]         | 18.3%                                           | 2.4%         | 0.00021 |
| Sodium/calcium exchanger 2                          | AAPAEGAGEDDDGASR [378, 394]  | 11.8%                                           | 11.0%        | 0.51    |
| Protein NipSnap homolog 3A                          | QYDGIFYEFR [30, 39]          | 25.5%                                           | 25.8%        | 0.90    |
| Tubulin beta-3 chain                                | MSSTFIGNSTAIQELFK [362, 378] | 38.4%                                           | 36.9%        | 0.73    |
| Spectrin beta chain, non-erythrocytic 1             | FATDGEGYKPCDPQVIR [593, 609] | 16.1%                                           | 19.7%        | 0.06    |
| Receptor-type tyrosine-protein phosphatase zeta     | FAVLYQQLDGEDQTK [345, 359]   | 40.9%                                           | 39.5%        | 0.49    |
| Annexin A2                                          | AEDGSVIDYELIDQDAR [179, 195] | 28.9%                                           | 32.4%        | 0.22    |
| Fatty acid-binding protein, heart                   | WDGQETTLVR [97, 106]         | 32.3%                                           | 31.0%        | 0.40    |
| N(G),N(G)-dimethylarginine dimethylaminohydrolase 1 | DYAVSTVPVADGLHLK [159, 174]  | Isomer peak is cut off in Skyline, not analyzed |              |         |

**Table S1.** Proteins discovered to contain isomerized peptides. Excluding tau, means and p-values were determined using a limited dataset of values (AD n=10, Control n=6) from hippocampus samples. No proteins aside from tau were statistically different in AD vs. Control. *Spectrin beta chain, non-erythrocytic 1* appeared to have potential statistical differences, but examining the entire hippocampus dataset revealed p=0.51. In *N(G),N(G)-dimethylarginine dimethylaminohydrolase 1*, an isomer peak fell partially outside of the chromatogram window, and a % isomerization value could not be accurately calculated.

**Table S2. Brain Tissue Stratification Description for SMTG**

|                            | <b>Control Low Path</b> | <b>Control High Path</b> | <b>Sporadic AD</b> | <b>Autosomal Dominant AD</b>                                                                      |
|----------------------------|-------------------------|--------------------------|--------------------|---------------------------------------------------------------------------------------------------|
| N                          | 9                       | 11                       | 19                 | 23                                                                                                |
| Age (yr)*                  | 88 +/- 5                | 90 +/- 5                 | 80 +/- 14          | 51 +/- 11                                                                                         |
| Sex (M:F)                  | 4:5                     | 5:6                      | 11:8               | 15:8                                                                                              |
| Post mortem interval (hr)* | 3.9 +/- 0.9             | 4.9 +/- 1.5              | 4.6 +/- 1.2        | 16.2 +/- 9.3                                                                                      |
| # APOE ε4 alleles          | 2 of 18                 | 6 of 22                  | 9 of 38            | 4 of 32                                                                                           |
| PSEN1 mutations            | None                    | None                     | None               | Y115C, 2x A260V, G206V, I229F, M233L, 3 x G209V, 2 x I143T, N135S, T245P, 2 x H163R, A431E, S169L |
| PSEN2 mutations            | None                    | None                     | None               | 6 x N141I                                                                                         |
| B Score (0 to 3 scale)     | 4 x B1, 5 x B2          | 5 x B2, 6 x B3           | B3 in all cases    | B3 in all cases                                                                                   |
| C Score (0 to 3 scale)     | C0 in all cases         | 5 x C2, 6 x C3           | 3 x C2, 16 x C3    | 1 x C2, 22 x C3                                                                                   |

\*mean ± SD



**Table S3. Brain Tissue Stratification Description for Hippocampus**

|                            | Control Low Path | Control High Path | Sporadic AD     | Autosomal Dominant AD |
|----------------------------|------------------|-------------------|-----------------|-----------------------|
| N                          | 10               | 11                | 21              | 2                     |
| Age (yr)*                  | 87 +/- 6         | 90 +/- 5          | 80 +/- 13       | 53 + 8                |
| Sex (M:F)                  | 5:5              | 5:6               | 12:9            | 2:0                   |
| Post mortem interval (hr)* | 3.9 +/- 0.9      | 5.1 +/- 1.3       | 4.5 +/- 1.3     | 9.8 + 6.2             |
| # APOE ε4 alleles          | 2 of 20          | 6 of 22           | 12 of 42        | 0 of 4                |
| <i>PSEN1</i> mutations     | None             | None              | None            | G209V, A431E          |
| <i>PSEN2</i> mutations     | None             | None              | None            | None                  |
| B Score (0 to 3 scale)     | 5 x B1, 5 x B2   | 5 x B2, 6 x B3    | B3 in all cases | B3 in all cases       |
| C Score (0 to 3 scale)     | C0 in all cases  | 5 x C2, 6 x C3    | 4 x C2, 17 x C3 | C3 in all cases       |

\*mean ± SD
